# Supplementary material for: Depleting the methyltransferase Suv39h1 improves DNA repair and extends lifespan in a progeria mouse model
Source: PubMed Central journal article supplement — Nat Commun. 2013 May 21;4:1868–. doi: 10.1038/ncomms2885 (PMC3674265; doi:10.1038/ncomms2885), 2013-05-21
Supplement: ncomms2885-s1.pdf [file ncomms2885-s1.pdf]

## Supplementary Figure S1

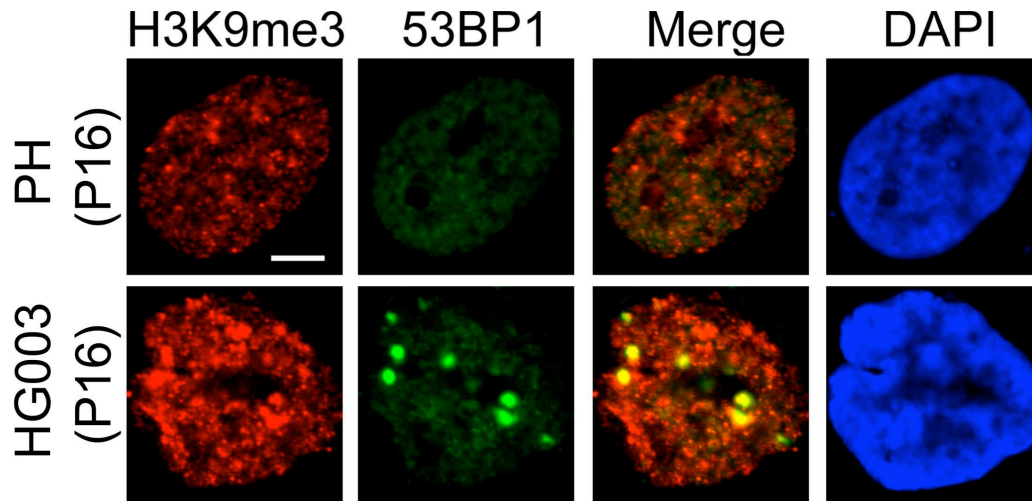

### Supplementary Figure S1: Defective heterochromatin repair in HGPS progeroid cells

Immunofluorescence staining of H3K9me3 and 53BP1 in PH and HGADFN003 (HG003) cells at 24 h after  $\gamma$ -irradiation. Scale bar, 10 $\mu$ m.

## Supplementary Figure S2

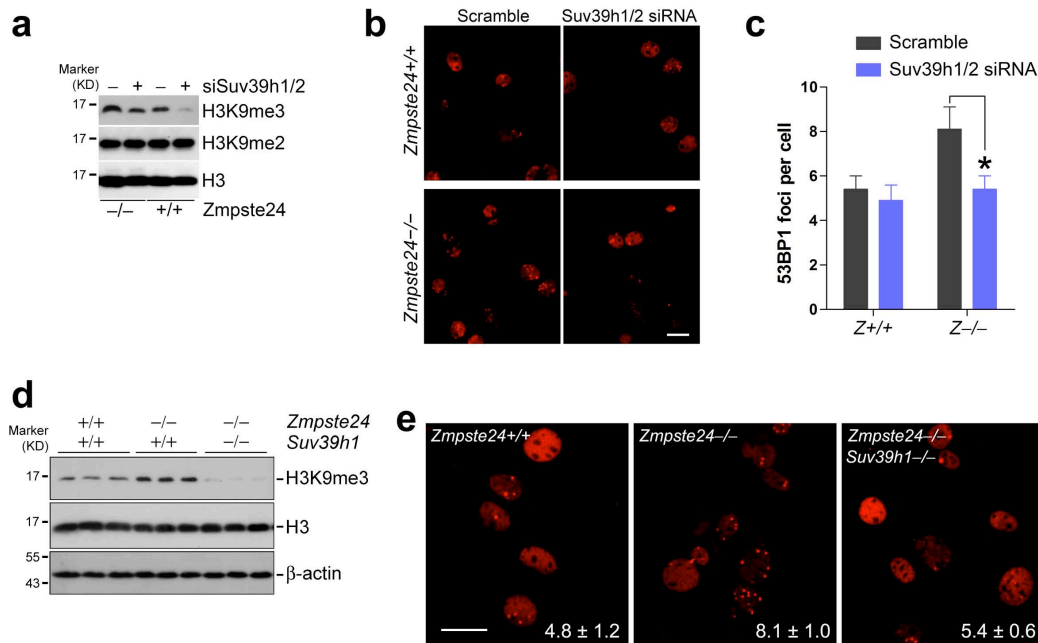

### Supplementary Figure S2: Knocking down or deleting Suv39h1 rescues defective DNA repair in *Zmpste24*<sup>-/-</sup> cells.

(a) H3K9me3 level in wild-type and *Zmpste24*<sup>-/-</sup> MEFs treated with Suv39h1/2 or scramble siRNA determined by Western blotting. (b) 53BP1 foci staining in wild-type and *Zmpste24* null MEFs treated with Suv39h1/2 or scramble siRNA 24 h after 5 Gy of  $\gamma$ -irradiation. Scale bar, 50  $\mu$ m. (c) Quantification of 53BP1 foci 24 h after 5 Gy of  $\gamma$ -irradiation in at least 200 cells in wild-type and *Zmpste24*<sup>-/-</sup> MEFs, with/without Suv39h1/2 siRNA. Data represent mean  $\pm$  s.e.m.,  $n > 200$ . \* $P < 0.05$ , 2-tailed  $t$ -test. (d) Representative immunoblot showing downregulated H3K9me3 in *Zmpste24*<sup>-/-</sup>/*Suv39h1*<sup>-/-</sup> MEFs. (e) Representative immunofluorescence staining showing 53BP1 foci 24 h after  $\gamma$ -irradiation in *Zmpste24*<sup>-/-</sup>/*Suv39h1*<sup>-/-</sup>, *Zmpste24*<sup>-/-</sup> and wild-type cells. 53BP1 foci per cell were quantified in at least 200 cells. Data represent mean  $\pm$  s.e.m.,  $n > 200$ .  $P < 0.05$ , 2-tailed  $t$ -test, *Zmpste24*<sup>-/-</sup>/*Suv39h1*<sup>-/-</sup> Vs *Zmpste24*<sup>-/-</sup> MEFs. Scale bar, 50  $\mu$ m.

## Supplementary Figure S3

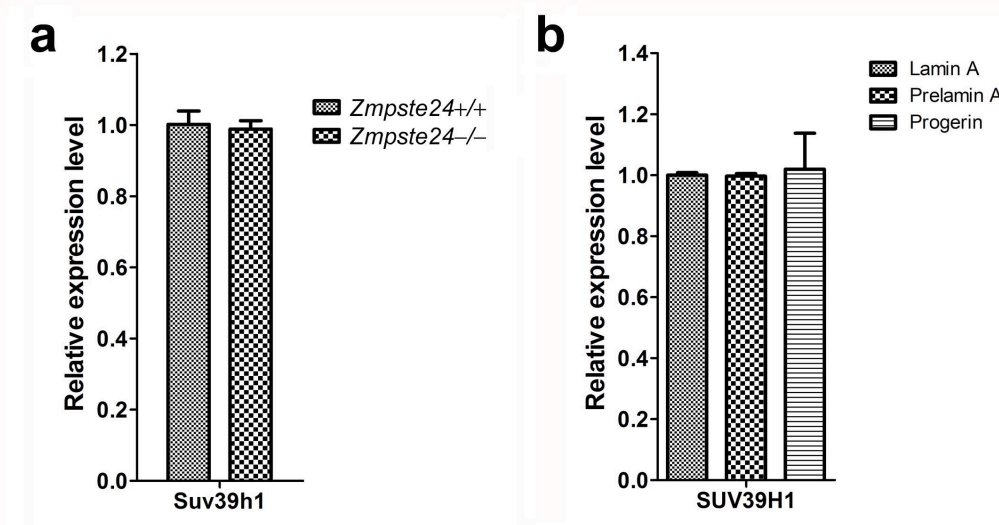

### Supplementary Figure S3: SUV39H1 mRNA level in progeroid cells

(a) Real-time PCR analyses of *Suv39h1* mRNA level in three lines of *Zmpste24*<sup>-/-</sup> MEFs compared with wild-type controls. Data represent mean  $\pm$  s.e.m.,  $n = 3$ .  $P > 0.05$ , 2-tailed  $t$ -test. (b) Real-time PCR analyses of *SUV39H1* mRNA level in HEK293 cells transfected with lamin A, prelamin A or progerin. Data represent mean  $\pm$  s.e.m.,  $n = 3$ .  $P > 0.05$ , 2-tailed  $t$ -test.

## Supplementary Figure S4

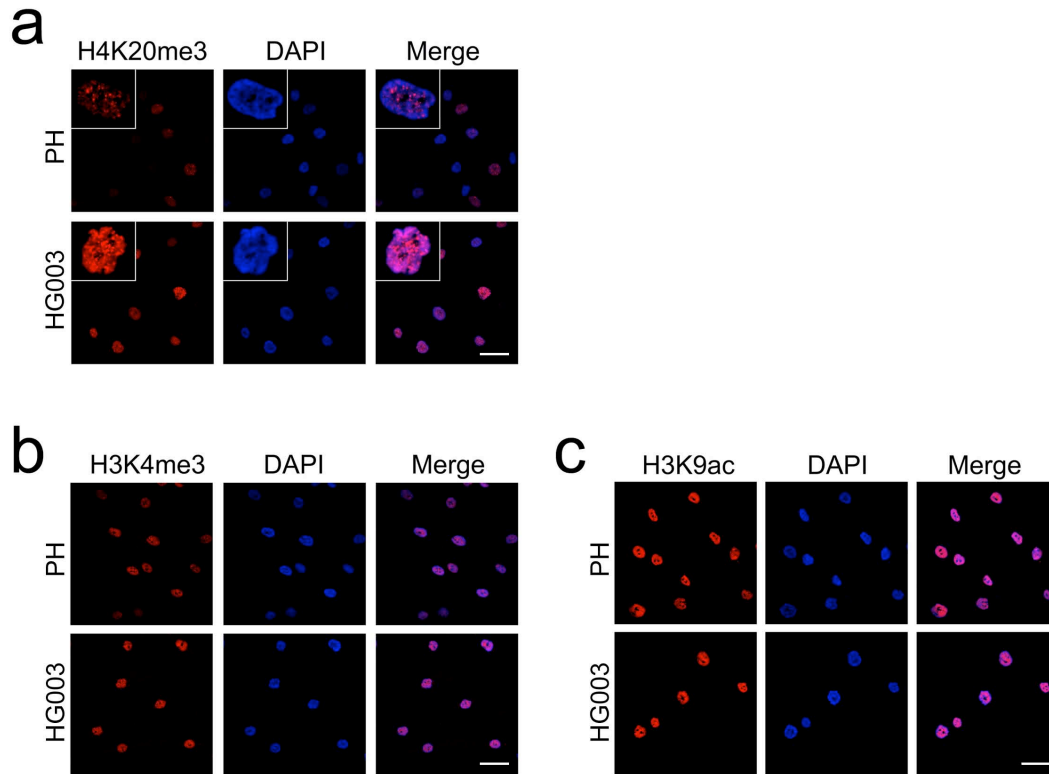

### Supplementary Figure S4: Histone modifications in progeroid cells

Representative photos of immunofluorescence staining of H4K20me3 (a), H3K4me3 (b) and H3K9ac (c) in PH and HGADFN003 (HG003) cells at passage 16. Scale bar, 40  $\mu\text{m}$ .

## Supplementary Figure S5

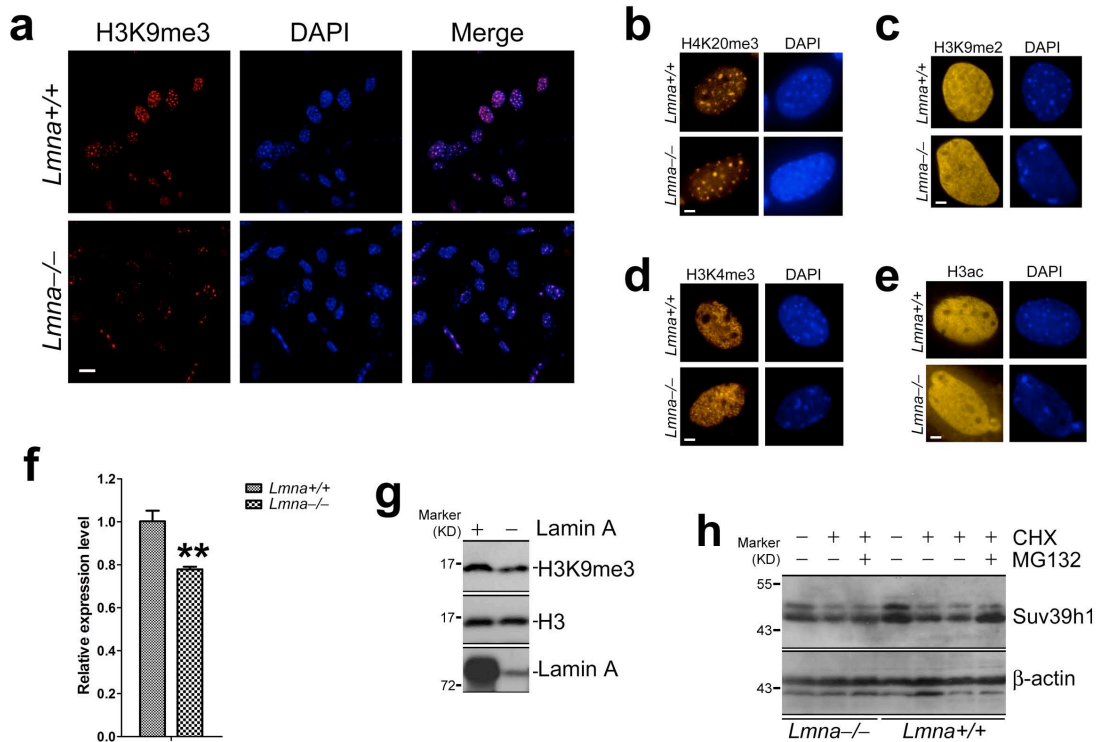

### Supplementary Figure S5: Levels of histone modifications and Suv39h1 in *Lmna* null cells

(a) Representative photos of immunofluorescence staining of H3K9me3 in *Lmna*<sup>-/-</sup> cells and wild-type controls from littermate. Scale bar, 20  $\mu$ m. (b-e) Representative photos of immunofluorescence staining of H4K20me3 (b), H3K9me2 (c), H3K4me3 (d) and acetyl H3 (e) in *Lmna* null and wild-type cells. Scale bar, 5  $\mu$ m. (f) Real-time PCR analyses of Suv39h1 mRNA level in three lines of *Lmna* null MEFs and wild-type controls. Data represent mean  $\pm$  s.e.m., n = 3. \*\**P* < 0.01, 2-tailed *t*-test. (g) Representative immunoblots showing upregulated H3K9me3 in HEK293 cells with ectopic lamin A. (h) Representative Western blotting of Suv39h1 in *Lmna* null and wild-type MEFs with CHX and MG132 treatment (30  $\mu$ M, 6 h).

## Supplementary Figure S6

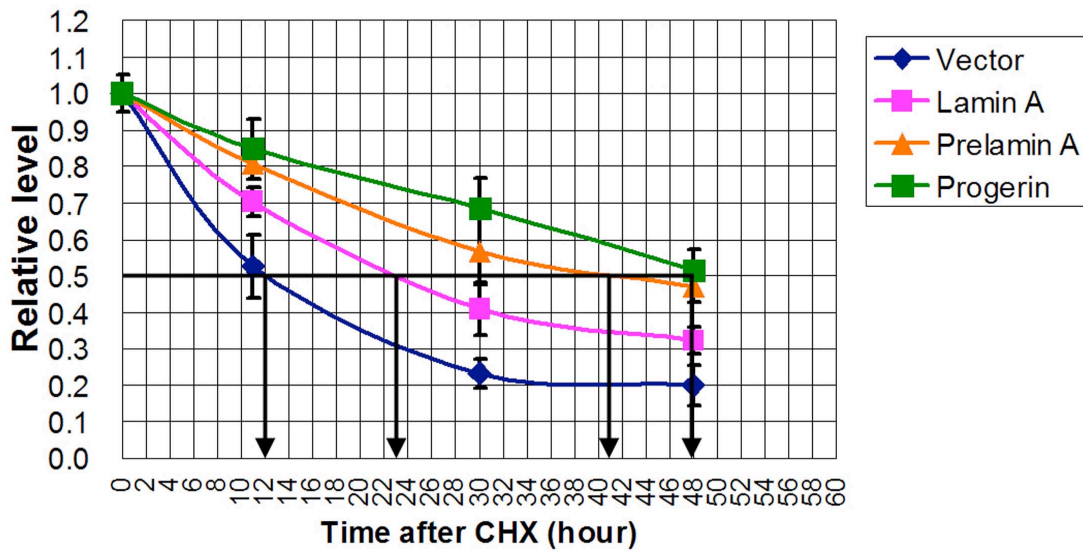

**Supplementary Figure S6: Degradation rate and half-life of GFP-SUV39H1 in HEK293 cells with ectopic A-type lamins.**

The protein level of GFP-SUV39H1 in HEK293 cells with indicated ectopic A-type lamins was determined at various time points after CHX treatment. Half-life of GFP-SUV39H1 in different HEK293 cell lines is indicated by arrow. Data represent mean  $\pm$  s.e.m., n = 3.

## Supplementary Figure S7

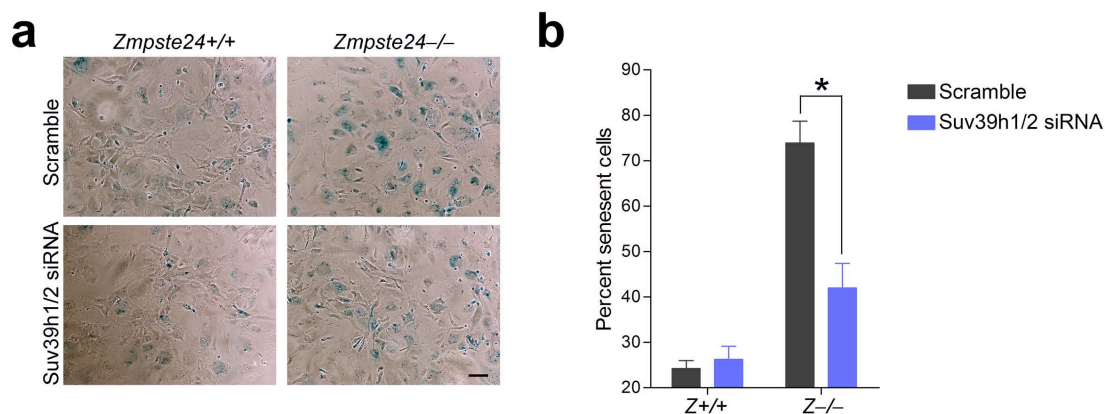

**Supplementary Figure S7: Knocking down Suv39h1/2 rescues early senescence in *Zmpste24*<sup>-/-</sup> MEFs.**

(a) Senescence-associated  $\beta$ -galactosidase assay in wild-type and *Zmpste24*<sup>-/-</sup> MEFs treated with Suv39h1/2 or scramble siRNA. Scale bar, 200  $\mu$ m. Levels of H3K9me3 were shown in Fig. S3a. (b) Quantification of senescent cells of at least 200 cells in wild-type or *Zmpste24*<sup>-/-</sup> MEFs, with Scramble or Suv39h1/2 siRNA. Data represent mean  $\pm$  s.e.m., n > 200. . \* $P < 0.05$ , 2-tailed  $t$ -test.

## Supplementary Figure S8

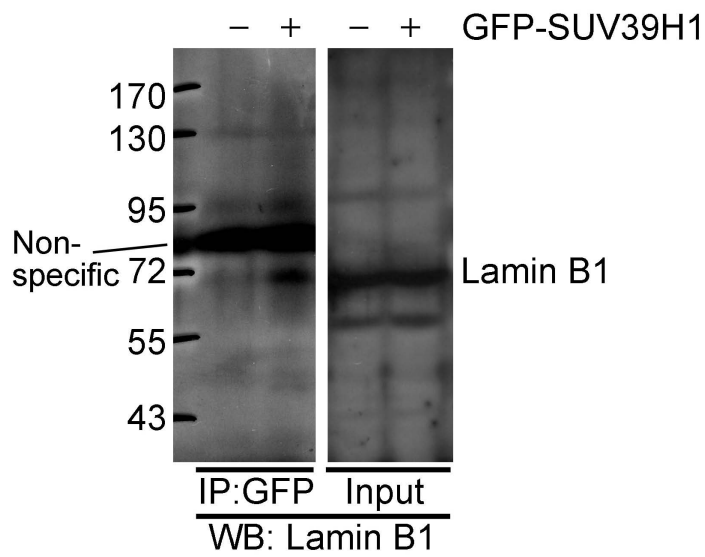

### Supplementary Figure S8: SUV39H1 interacts with lamin B1.

GFP-SUV39H1 was ectopically expressed in HEK293 cells. Representative immunoblots showing lamin B1 in the anti GFP immunoprecipitates. Data are representative of three independent experiments.



# Supplementary Figure S9

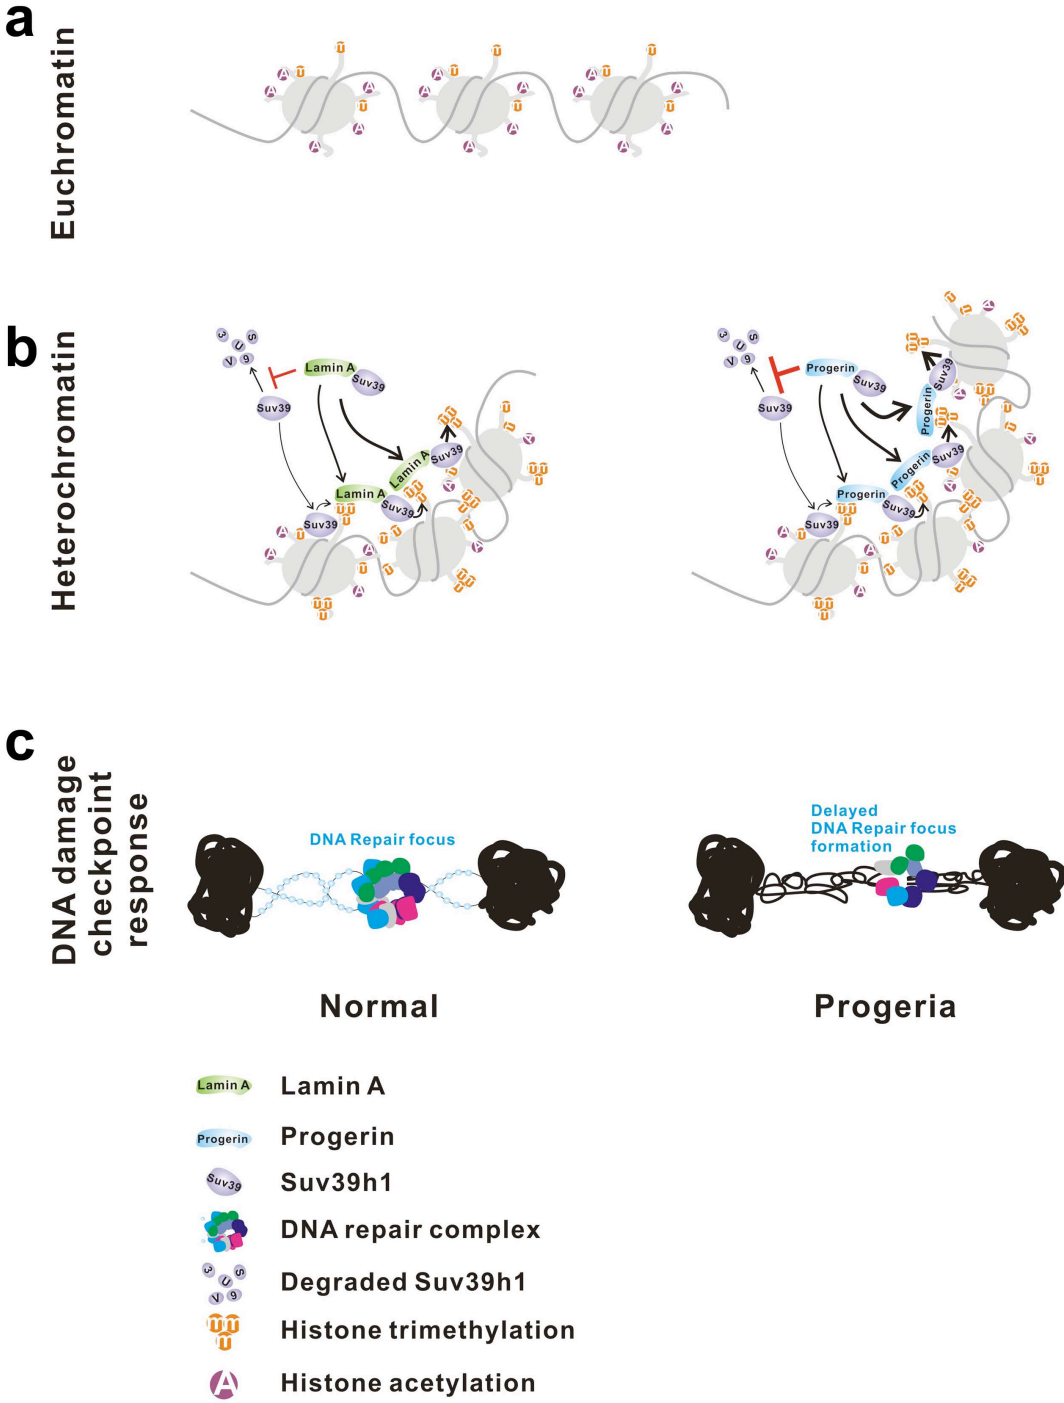

**Supplementary Figure S9: Schematic model of lamin A in the regulation of H3K9me3 marked heterochromatin.**

(a) Euchromatin. (b) Lamin A interacts with Suv39h1 thus protecting it from proteasomal degradation. Suv39h1 alone or in cooperation with other co-factors initiates H3K9me3 mark on individual nucleosome. The direct interaction between trimethylated H3K9 and lamin A (ref 34) facilitates recruiting chromatin to the nuclear compartment wherein the lamin A-Suv39h1 complex resides and Suv39h1 trimethylates H3K9 on adjacent nucleosomes thus expanding heterochromatic marks. Increased binding of progerin/prelamin A to Suv39h1 and H3K9me3 enhances the level of Suv39h1 and the recruitment of adjacent nucleosomes, thus increasing H3K9me3-marked heterochromatin in progeria. (c) Elevated heterochromatin marked with H3K9me3 imposes a barrier in DNA damage-induced nucleosomal remodeling, which delays the recruitment of necessary repair proteins and compromises DNA repair, leading to accumulation of unrepaired/irreparable DNA damages in progeria cells.

# Supplementary Figure S10

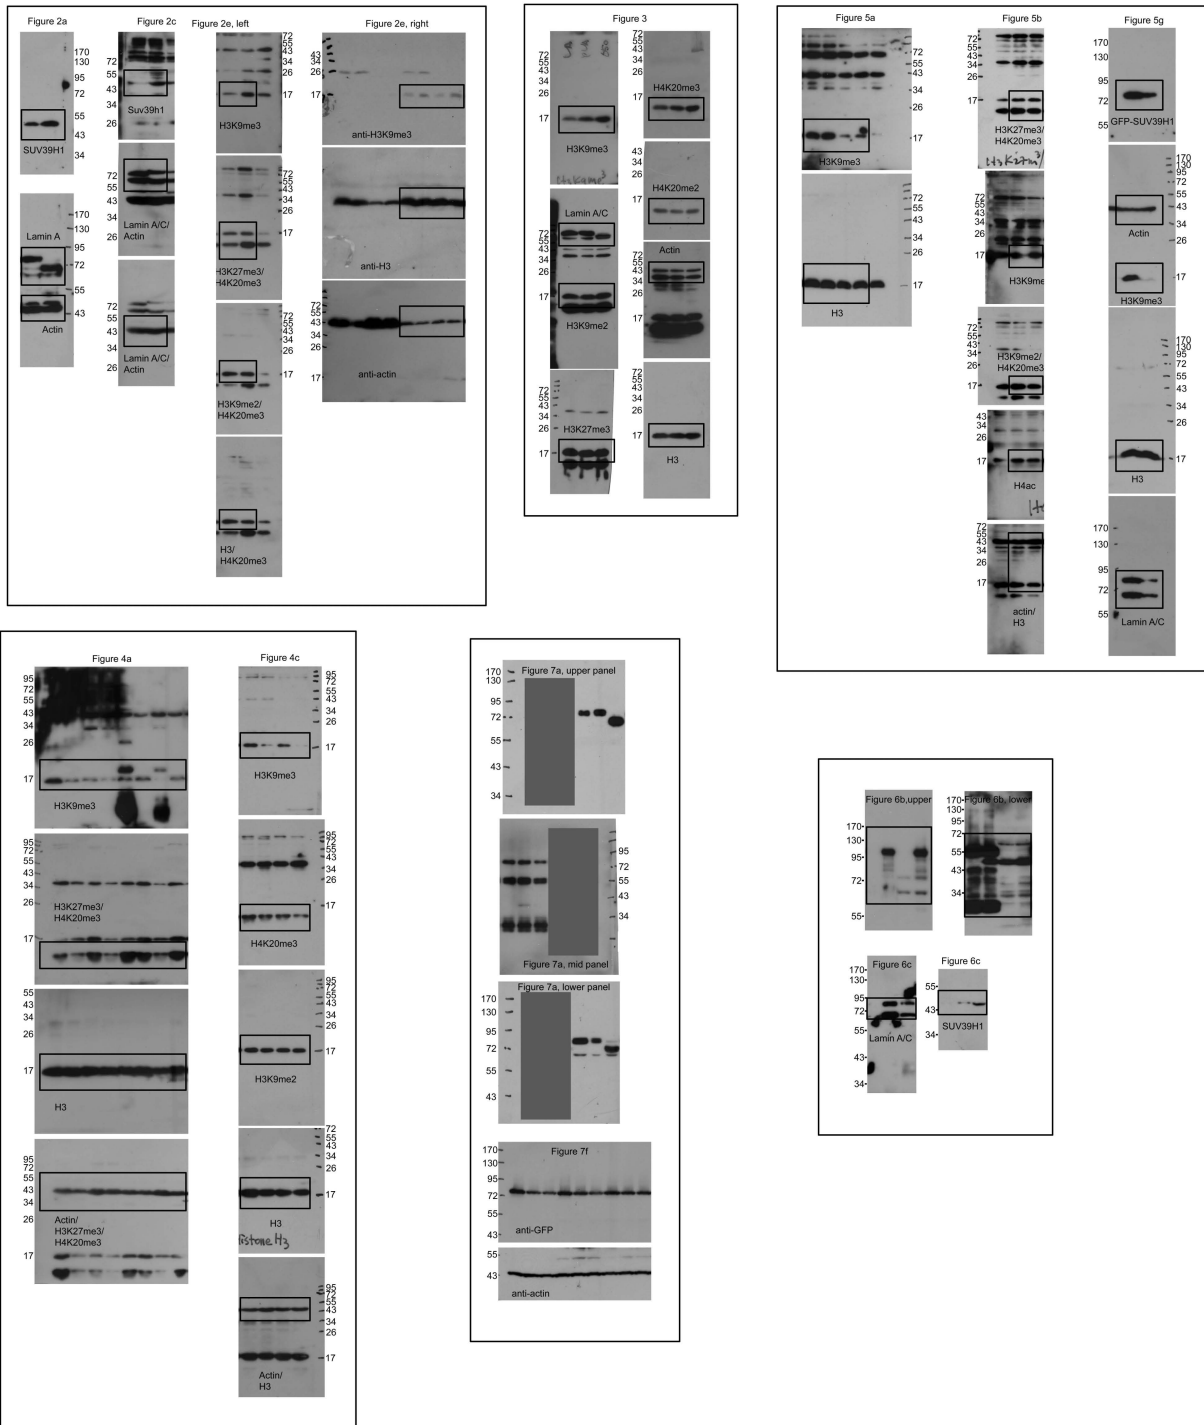

Supplementary Figure S10. Full length images of immunoblots.
